# Supplementary material for: Systematics and Evolution of the Miocene Three-Horned Palaeomerycid Ruminants (Mammalia, Cetartiodactyla)
Source: PLoS One. 2015 Dec 2;10(12):e0143034. doi: 10.1371/journal.pone.0143034 (PMC4668073; doi:10.1371/journal.pone.0143034)
Supplement: S1 Table — (xlsx file). (XLSX) [file pone.0143034.s004.xlsx]

## Sheet: Postcranial
Table X. Postcranial measurements (in mm) of Xenokeryx amidalae sp. nov (TD: transversal diameter; APD: anteroposterior diameter; diaph.: diaphysis; t.c.: tuber calcanei; s: sustentaculum)
Scapula	Right/Left	Min. neck APD	Distal DT	Distal APD	Glen. cav. APD	total length
MNCN-74461	L	36.52	35.03	52.84	43.71
Humerus		Diaph. TD	Diaph. APD	Distal TD	Distal APD
MNCN-74463	L	28.5	27.41	49	49.24
Radius-ulna		Diaph. TD	Diaph. APD	Distal TD	Distal APD	Proximal TD	Proximal APD
MNCN-74473	L					52.63	30.4
MNCN-74459	R	35.05	26.39	56.44	38.62
MNCN-74460	R	35.13	21.78			54.41	30.19
Semilunate		Anterior Height	Proximal TD	Distal TD	APD
MNCN-74484	R	25.87	23.32	21.66	32.74
Pyramidal		Anterior Height	Maximum Height	TD	APD
MNCN-74494	L			17.2
MNCN-74493	R	25.39	34.56	20.77	31.92
MNCN-74491	R	21.22		18.86
Magnotrapezoid		Anterior TD	Posterior TD	APD	Anterior Height
MNCN-74483	L	26.03	20.71	26.66	10.15
Metacarpal III-IV		Total Length	Diaph. TD	Diaph. APD	Proximal TD	Proximal APD	Uniform facet TD	Magnotrapezoid facet TD
MNCN-74472	R		29.04	24	42.58	32.37	19.98	21.15
Femur		Diaph. TD	Diaph. APD	Distal TD	Distal APD	caput femoris TD	caput femoris APD
MNCN-74471	L	39.04				40.34	33.09
MNCN-74462	R	23.18	23	40.85	60.57
Patela		TD	Height	APD
MNCN-74485		32.45	38.7	24.97
Tibia		Distal TD	Distal APD
MNCN-74466	L	43.79	35.92
Maleollar		Maximum Height	APD	TD
MNCN-74482	L	19.95	29.6	14.49
MNCN-74481	R	21.47	25.87	13.83
Calcaneus		Total Length	t.c. TD	t.c. APD	Diaph. TD	Diaph. APD	s. Length	s. TD
MNCN-74503	R		20.87	21.47	11.59	23.47	57.74	25
MNCN-74470	R	116.77	28.24	32.1	13.95	29.32	78.54	36.2
MNCN-74469	R	101.34	24.23	30.28	13.41	26.7	70.58	33.43
Astragalus		Medial Length	Lateral Length	Medial APD	Lateral APD	Distal DT
MNCN-74476	L	42.93	46.96	27.53	28.15	31.33
Navicular-cuboid		TD	APD	Cuboid Anterior Height	Navicular Anterior Height	Total Anterior Height	Posterior Height	Astragalus Articular Facet TD
MNCN-74490	L			21.69	13.33	22.6
MNCN-74492	R
MNCN-74499	R	40.72	40.6	21.41	14.15	26.7	35.86	31.14
MNCN-74479	L	42.02		19.88	13.63	23.75		31.9
MNCN-74480	R	41.61	40.78	22.26	15.03	26.73	32.75	31.56
MNCN-74477	R	40.72	40.92	21.79	13.31	26.17	34.97
Ectomesocuneiform		Anterior Height	TD	APD
MNCN-74500	R	11.2	17.22	27.12
MNCN-74501	R	10.6	15.84	26.04
MNCN-74502	R	11.1	18.61	24.96
Metatarsal III-IV		Diaph. TD	Diaph. APD	Proximal TD	Proximal APD
MNCN-74474		26.48		40.86
MNCN-74464	L	23.7	26.78	40.79	42.47
First Phalanx		Total Length	Proximal TD	Proximal APD	Distal TD	Distal APD	Diaph. TD	Diaph. APD
MNCN-74486	R	51.44	19.58	22.92	16.99	15.19	14.76	15.84
MNCN-74498	L	43.56	17.02	17.02	13.31	10.95	12.27	12.1
MNCN-74488	L				16.51	12.02	13.98
Second Phalanx		Total Length	Proximal TD	Proximal APD	Distal TD	Distal APD	Diaph. TD	Diaph. APD
MNCN-74487	R	32.7	18.86	20.83	16.9	21.69	15.63	17
MNCN-74489	L	31.65	17	18.16	15.89		13.56	15.14

## Sheet: Cranial
Table X. Dental measurements (in mm) of Xenokeryx amidalae sp. nov
			LENGTH	WIDTH
MNCN-74458	R	p3	18.32	10.74
MNCN-74458	R	p4	15.04	11.51
MNCN-74496	R	m1	20.92	12.9
MNCN-74458	R	m1	17.34	14.23
MNCN-74456	L	m1	20.01	13.74
MNCN-74458	R	m2	20.62	16.61
MNCN-74455	R	m2	21.88	14.51
MNCN-74456	L	m2	23.66	16.29
MNCN-74457	R	m3	32.11	13.67
MNCN-74458	R	m3	30.76	14.93
MNCN-74456	L	m3	36.68	14.97
MNCN-74455	R	m3	28.31	13.39
MNCN-74495	L	D2	16.46	13.83
MNCN-74495	L	D3	20.55	14.68
MNCN-74495	L	D4	18.94	17.49
MNCN-74453	R	P3	15.36	17
MNCN-74451	R	P4	17.87	18.37
MNCN-74454	L	P4	18.57	-
MNCN-74450	R	P4	14.86	19.82
MNCN-74495	L	M1	21.06	21.45
MNCN-74450	R	M1	19.23	21.62
MNCN-74452	R	M3	20.36	23.52
Table X. Mandible and maxilar measurements (in mm) of Xenokeryx amidalae sp. nov
		p2-m3	p2-p4	m1-m3	Height at m1	Width at m1	Height at m2	Width at m2
MNCN-74458	R	108.82	46.92	65.74	36.77	15.27	38.89	16.44
MNCN-74456	L			79.94
MNCN-74455	R			64.72			36.64	17.95
		D2-M1	D2-D4
MNCN-74495	L	72.17	52.43
Table X. Ossicone measurements (in mm) of Xenokeryx amidalae sp. nov
Occipital ossicone	Height	APD	Maximum TD	Minimum TD	Basal TD
MNCN-74448	106.97	23.52	166	38.95	60.88
Single frontal ossicones	Dorsal length	Height	Base TD	Base APD	Base circumference	Middle TD	Middle APD	Top TD	Top APD
MNCN-74449	93	62.58	38.93	40.76	110	21.59	20.84	11.22	12.54
MNCN-74446	54	45.93	26.72	30.68	67	13.3	15.45	9.61	8.91
MNCN-74447			22.43	33.93	71
